# **BldC delays entry into development to produce a sustained period of vegetative growth in *Streptomyces venezuelae***

**Matthew J. Bush<sup>1,\*</sup>, Govind Chandra<sup>1</sup>, Mahmoud M. Al-Bassam<sup>1,#</sup>, Kim C. Findlay<sup>2</sup>  
and Mark J. Buttner<sup>1</sup>**

<sup>1</sup>*Department of Molecular Microbiology, and* <sup>2</sup>*Department of Cell and Developmental Biology, John Innes Centre, Norwich Research Park, Norwich NR4 7UH, UK.*

\* To whom correspondence should be addressed. Tel: 44 (0) 1603 450757; Fax: 44 (0) 1603 450778; Email: [matt.bush@jic.ac.uk](mailto:matt.bush@jic.ac.uk)

# Current address: Department of Paediatrics, Division of Host–Microbe Systems and Therapeutics, University of California San Diego, 9500 Gilman Drive, La Jolla, CA 92093, USA

**KEYWORDS** Morphological differentiation; sporulation; cell division; transcriptional regulation.

Word count Abstract: 234

Word count Importance Statement 150

Word count text (excluding references, footnotes and figure legends): 4606

## 2 **ABSTRACT**

3 Streptomyces are filamentous bacteria that differentiate by producing spore-bearing  
4 reproductive structures called aerial hyphae. The transition from vegetative to reproductive  
5 growth is controlled by the *bld* (bald) loci, and mutations in *bld* genes prevent the formation  
6 of aerial hyphae, either by blocking entry into development (typically mutations in activators)  
7 or by inducing precocious sporulation in the vegetative mycelium (typically mutations in  
8 repressors). One of the *bld* genes, *bldC*, encodes a 68-residue DNA-binding protein related to  
9 the DNA-binding domain of MerR-family transcription factors. Recent work has shown that  
10 BldC binds DNA by a novel mechanism, but there is less insight into its impact on  
11 *Streptomyces* development. Here we used ChIP-seq coupled with RNA-seq to define the  
12 BldC regulon in the model species *Streptomyces venezuelae*, showing that BldC can function  
13 both as a repressor and as an activator of transcription. Using electron microscopy and time-  
14 lapse imaging, we show that *bldC* mutants are bald because they initiate development  
15 prematurely, bypassing the formation of aerial hyphae. This is consistent with the premature  
16 expression of BldC target genes encoding proteins with key roles in development (e.g. *whiD*,  
17 *whiI*, *sigF*), chromosome condensation and segregation (e.g. *smeA-sffA*, *hupS*), and  
18 sporulation-specific cell division (e.g. *dynAB*), suggesting that BldC-mediated repression is  
19 critical to maintain a sustained period of vegetative growth prior to sporulation. We discuss  
20 the possible significance of BldC as an evolutionary link between MerR family transcription  
21 factors and DNA architectural proteins.

22

23 **IMPORTANCE**

24 Understanding the mechanisms that drive bacterial morphogenesis depends on the dissection  
25 of the regulatory networks that underpin the cell biological processes involved. Recently,  
26 *Streptomyces venezuelae* has emerged as an attractive new model system for the study of  
27 morphological differentiation in *Streptomyces*. This has led to significant progress in  
28 identifying the genes controlled by the transcription factors that regulate aerial mycelium  
29 formation (Bld regulators) and sporulation (Whi regulators). Taking advantage of *S.*  
30 *venezuelae*, we used ChIP-seq coupled with RNA-seq to identify the genes directly under the  
31 control of BldC. Because *S. venezuelae* sporulates in liquid culture, the complete spore-to-  
32 spore life cycle can be examined using time-lapse microscopy, and we applied this technique  
33 to the *bldC* mutant. These combined approaches reveal BldC to be a member of an emerging  
34 class of Bld regulators that function principally to repress key sporulation genes, thereby  
35 extending vegetative growth and blocking the onset of morphological differentiation.

## 36 INTRODUCTION

37 The complex *Streptomyces* life cycle involves two distinct filamentous cell forms: the  
38 growing or vegetative hyphae and the reproductive or aerial hyphae, which differentiate into  
39 long chains of spores (1-6). Genetic studies identified the regulatory loci that control entry  
40 into development, which are called *bld* (bald) genes because null mutations in these loci  
41 prevent the formation of aerial hyphae. However, baldness can arise for two different reasons.  
42 The larger class of *bld* mutants, which define positive regulators, fail to initiate development,  
43 forming colonies of undifferentiated vegetative mycelium. In contrast, a smaller but growing  
44 class of *bld* mutants, which define negative regulators, enter development prematurely,  
45 inducing sporulation in the vegetative mycelium and bypassing the formation of aerial  
46 hyphae. Thus, macroscopically these two classes of mutants look similar, forming smooth  
47 colonies that lack the ‘hairy’ appearance of the wild type, but microscopically it is apparent  
48 that they arise for diametrically opposed reasons (5, 7-9).

49 BldC is a small, 68-residue protein with a winged Helix-Turn-Helix (wHTH) motif, related to  
50 those found in MerR-family proteins (10). The basic structure of classical MerR proteins is a  
51 dimer consisting of two identical subunits, each composed of an N-terminal wHTH DNA-  
52 binding domain, a C-terminal effector-recognition domain and an interconnecting linker  
53 region that consists of a long  $\alpha$ -helix that interacts with the same helix in the other subunit,  
54 forming an antiparallel coiled-coil responsible for homodimerization. MerR proteins share  
55 significant sequence similarity only within their DNA-binding domains; as different family  
56 members bind different effectors, their C-terminal domains are variable and show little, if  
57 any, similarity to one another.

58 MerR transcription factors bind to palindromic DNA sequences as homodimers. However,  
59 unlike classical members of the MerR family, BldC has neither an effector domain nor the

60 dimerization helix, and BldC behaves as a monomer in free solution (11). As a consequence,  
61 how BldC might bind DNA remained unclear. To address this question, Schumacher et al.  
62 (11) carried out biochemical and structural studies to characterize the binding of *S. coelicolor*  
63 BldC to the promoters of two known target genes, *whiI* and *smeA*. These studies showed that  
64 BldC binds DNA in a completely different way to classical MerR regulators, instead  
65 involving asymmetric, cooperative, head-to-tail oligomerization on DNA direct repeats with  
66 concomitant pronounced DNA distortion (11). The number of direct repeats present in BldC-  
67 binding sites is variable, thus allowing cooperative, head-to-tail binding of additional BldC  
68 monomers. Since BldC-like proteins radiate throughout the bacteria, this study identified  
69 BldC as the founding member of a new structural family of transcription factors.

70 Although the work by Schumacher et al. (11) has provided a clear mechanistic understanding  
71 of how BldC binds DNA, there has been less insight into its biological role and impact on  
72 *Streptomyces* development. In part, this is because previous studies have focussed on the  
73 classical model species, *S. coelicolor*, which sporulates only on solid medium. Here we  
74 exploit the benefits of the new model species, *Streptomyces venezuelae*, which sporulates in  
75 liquid culture (12), to study the biological role of BldC. Using ChIP-seq coupled with RNA-  
76 seq, we identify the genes under BldC control and show that BldC can function both as a  
77 repressor and as an activator of transcription. We show that *bldC* mutants are bald because  
78 they enter development prematurely, bypassing the formation of aerial hyphae. This  
79 correlates with the premature expression of BldC target genes with key roles in development,  
80 chromosome condensation and segregation, and sporulation-specific cell division, suggesting  
81 that BldC-mediated repression is critical to maintain a sustained period of vegetative growth  
82 prior to sporulation.

83

84

## 85 RESULTS

### 86 Deletion of *bldC* causes premature initiation of development

87 We constructed an *S. venezuelae bldC* mutant by replacing the *bldC* coding region with an  
88 apramycin resistance (*apr*) cassette. The resulting mutant was bald, unable to produce the  
89 reproductive aerial hyphae that give mature wild-type *Streptomyces* colonies their  
90 characteristic fuzzy appearance (Fig. 1). However, scanning electron microscopy (SEM) of  
91 mature colonies of the *bldC* mutant showed that most of the biomass consisted of spores,  
92 rather than undifferentiated vegetative hyphae (Fig. 2). Comparison of the growth of the wild  
93 type and the *bldC* mutant on plates over time showed that after one day they looked similar  
94 (vegetative growth only) but after two days the wild type had produced aerial hyphae while  
95 the *bldC* mutant was still restricted to vegetative growth. After 3 days, the aerial hyphae of  
96 the wild type had differentiated into spores, and most of the biomass of the *bldC* mutant had  
97 also differentiated into spores, bypassing aerial mycelium formation. The *bldC* mutant also  
98 seemed to produce higher levels of extracellular matrix than the wild type (Fig. 2). The *bldC*  
99 mutant phenotype was fully complemented by introducing a single copy of the *bldC* gene  
100 under the control of its native promoter, expressed *in trans* from the  $\Phi$ BT1 integration site  
101 (Figs. 1 and 2).

102

103 Using an established microfluidic system and methodology (12), we conducted fluorescence  
104 time-lapse microscopy to further study the developmental defects associated with deletion of  
105 *bldC*. As in previous studies (7, 12-13), we introduced an FtsZ-YPet translational fusion into  
106 the wild type, mutant and complemented mutant strains, allowing us to monitor each of the  
107 two distinct modes of cell division that occur in *Streptomyces*. In Fig. 3, the scattered single  
108 Z-rings mark the position of vegetative cross-walls, which do not constrict or give rise to cell-  
109 cell separation, but simply divide the vegetative hyphae into long, box-like compartments

110 (e.g. Figs. 3A + C, panel 2). In contrast, during reproductive growth, long ladders of regularly  
111 spaced Z-rings are synchronously deposited along sporogenic hyphae. These Z-rings mark  
112 the sites of sporulation septa, which do constrict, ultimately leading to the formation of chains  
113 of spores (e.g. Figs. 3A and C, panels 3 and 4). Time-lapse imaging of strains harbouring the  
114 FtsZ-YPet fusion showed that the duration of vegetative growth was shorter in the *bldC*  
115 mutant compared to the wild type and the complemented mutant (Fig. 3 and Movies S1 A/B,  
116 S2 A/B and S3 A/B). Noticeably, following germination, hyphal outgrowth in the *bldC*  
117 mutant was associated with an immediate increase in FtsZ-YPet expression, leading to the  
118 precocious formation of ladders of Z-rings (Fig. 3B and Movie S2A/B). However, although  
119 ladders of Z-rings were observed as early as 4 hours in the *bldC* mutant, mature spores were  
120 not observed in the corresponding DIC images until 21 hours, the same time that mature  
121 spores were seen in the wild type (Figs. 3A and B). Wild-type patterns of FtsZ expression and  
122 sporulation were restored in the complemented mutant (Fig. 3C and Movie S3A/B). From  
123 these data, we concluded that the overall role of BldC is to sustain vegetative growth and  
124 delay entry into development.

125

### 126 **BldC levels are highest early in development**

127 Using an anti-BldC polyclonal antibody, we monitored BldC levels in *S. venezuelae* during  
128 sporulation in liquid culture. Western blotting showed that BldC is abundant throughout the  
129 life cycle, but that BldC levels are highest early on, during vegetative growth (Fig. 4).

130

### 131 **Defining the BldC regulon in *S. venezuelae***

132 Previously, ChIP-seq (or ChIP-chip) coupled with transcriptional profiling has enabled us to  
133 define the regulons of several key developmental regulators in *S. venezuelae* (14-17). Here,  
134 we employed the same approach, using an anti-BldC polyclonal antibody to identify the

135 promoters directly bound by BldC. We performed ChIP-seq at two distinct stages of  
136 vegetative growth when BldC was abundant: early vegetative growth (10 hr) and pre-  
137 sporulation (14 hr). This work revealed ~360 potential gene targets, the majority of which  
138 were bound by BldC at both time points (Table S1A). These targets include many genes  
139 encoding key transcriptional regulators of the *Streptomyces* developmental cascade (e.g.  
140 *bldM*, *whiB*, *wblA*, *whiD*, *whiH*, *whiI*, *sigF* and *bldC* itself), others encoding proteins  
141 involved in chromosome condensation and segregation during sporulation (e.g. *hupS*, *smeA*-  
142 *sffA*), and those directly involved in cell division during sporulation (e.g. *dynAB*, *ssgB*) (Fig.  
143 5 and Table 1). Schumacher et al. (11) characterized the interaction of *S. coelicolor* BldC  
144 with the promoters of two of its previously known targets, *whiI* and the *smeA-ssfA* operon.  
145 *whiI* encodes an orphan response regulator that is essential for the later stages of sporulation,  
146 when it forms a functional heterodimer with a second orphan response regulator, BldM,  
147 enabling WhiI to bind to DNA and regulate the expression of ~40 sporulation genes (14). The  
148 *smeA-ssfA* operon encodes a small membrane protein (SmeA) that recruits a DNA translocase  
149 (SffA) to sporulation septa (18). Deletion of *smeA-ssfA* results in a defect in spore  
150 chromosome segregation and has pleiotropic effects on spore maturation (18).

151 Schumacher et al. (11) showed that BldC binds to DNA in a head-to-tail fashion at a variable  
152 number of direct repeats. So, for example, in the *whiI*-BldC structure, there are two direct  
153 repeats resulting in the head-to-tail oligomerisation of two BldC monomers, whereas in the  
154 *smeA*-BldC structure there are four direct repeats resulting in the head-to-tail oligomerisation  
155 of four BldC monomers. In line with this, our data show a broader BldC ChIP-seq peak at the  
156 *smeA* promoter compared to the *whiI* promoter (Fig. 5). Indeed, regions of BldC enrichment  
157 across the *S. venezuelae* genome were often noticeably broad. Approximately 60% of BldC  
158 targets were defined by narrow, *whiI*-like ChIP-seq peaks, but the remaining ~40% showed  
159 ChIP-seq peaks at least as broad as the peak observed at the *smeA* promoter (Fig. S1, Table



160 S2). The cooperative binding of BldC to DNA revealed by structural analysis (11) suggested  
161 that dimerization on DNA would be the minimum requirement for DNA binding and that  
162 extended multimerization would occur at target promoters carrying additional direct repeats.  
163 The BldC-DNA structures identified two major elements that define the specificity of BldC  
164 binding: a 4-bp AT-rich sequence with a C or G four-five nucleotides downstream. The  
165 consensus direct repeat is 5'-AATT(N<sub>3-4</sub>)(C/G)-3', but the BldC-*smeA* structure showed that  
166 conservation of even this degenerate consensus is not critical for BldC binding. In particular,  
167 for the AT-rich sequence, it is the narrowing of the minor groove caused by the AT-rich  
168 nature of that sequence that is important, rather than direct base reading by BldC (11).  
169 Because of this plasticity, it is not possible to predict BldC binding sites bioinformatically.  
170 Nevertheless, using this loose consensus as a guide, it seems likely that the BldC targets with  
171 narrow ChIP-seq peaks have two appropriately spaced direct repeat sequences, whereas BldC  
172 targets with broad ChIP-seq peaks, such as *smeA-sffA*, *cdgE* and *dynAB*, have more (Fig. S1).

173

#### 174 **BldC represses the transcription of a subset of target genes**

175 *whiI* and the *smeA-sffA* operon were originally identified as BldC targets in *S. coelicolor* (11),  
176 but ChIP-seq analysis showed that they are also BldC targets in *S. venezuelae* (Fig. 5, Table  
177 1). To assess the regulatory influence of BldC on the *whiI* and *smeA* promoters, we  
178 performed qRT-PCR using RNA isolated from wild-type *S. venezuelae* and the *bldC* mutant  
179 during vegetative growth (10 hr), when BldC is abundant in wild-type cells (Fig. 6). Under  
180 these conditions, expression of both *whiI* and *smeA* is significantly higher in the *bldC* mutant  
181 compared to the wild type. This suggests that BldC functions to repress the transcription of  
182 these developmental target genes during vegetative growth, consistent with the premature  
183 initiation of development seen in a *bldC* mutant. To gain a global view of the regulatory  
184 impact of BldC, we conducted RNA-seq to compare the transcriptomes of wild-type *S.*

185 *venezuelae* and the *bldC* mutant at 10 hr and 14 hr timepoints, when both strains were still  
186 growing vegetatively (Table S1B). The RNA was prepared from the same cultures used to  
187 make protein extracts for the BldC Western blotting shown in Fig. 4. In line with the qRT-  
188 PCR data, *whiI* and *smeA* showed significant increases in expression in the *bldC* mutant  
189 compared with the wild type. The *smeA* and *sffA* genes form an operon and, consistent with  
190 this, both genes showed similar upregulation of expression at the 10 hr and 14 hr time points  
191 (Table 1). In total, 156 of the genes we identified as BldC targets in ChIP-seq showed a  
192 greater than 2-fold increase in expression in the *bldC* mutant (Table S1C and Fig. 7). These  
193 included the key developmental genes *sigF*, *whiD* and *hupS*, which showed a greater than  
194 two-fold increase in expression ( $\log_{2}FC > 1$ ) in the *bldC* mutant, compared to the wild type at  
195 both the 10 hr and 14 hr timepoints (Table 1). qRT-PCR confirmed the upregulation of *sigF*,  
196 *whiD* and *hupS* expression in the *bldC* mutant relative to the wild type, as was observed for  
197 *whiI* and *smeA* (Fig. 6).

198 Among the other BldC targets identified by ChIP-seq were a number of genes encoding  
199 members of the Penicillin-Binding Protein (PBP) family, required for the synthesis of  
200 peptidoglycan (19, 20). Our data indicates that the *vnz12970* and *vnz23255* genes, encoding  
201 Class A high molecular mass (HMM) PBPs and the *vnz15130* gene, encoding a low  
202 molecular mass (LMM) PBP, are all targets of BldC (Table 1). Expression of these PBP-  
203 encoding genes is significantly upregulated in a *bldC* mutant during vegetative growth  
204 compared to the wild type, showing that BldC functions to repress their transcription (Table  
205 1).

206 Peptidoglycan synthesis is required to produce new wall material during cell elongation and  
207 to produce septa during division (21). Most rod-shaped bacteria possess distinct gene-pairs to  
208 control these two processes, a protein of the SEDS (shape, elongation, division, and  
209 sporulation) family and its cognate class B PBP. In *E. coli*, the RodA-PBP2 and FtsW-FtsI

210 pairs control elongation and division respectively (22). In *S. venezuelae*, there are four  
211 equivalent SEDS-PBP pairs and our data indicate that one of these pairs, *vnz24690* and  
212 *vnz24685*, is under BldC control (Fig. 5 and Table 1). BldC binds upstream of this gene pair  
213 and both genes show >4-fold increase (logFC >2) in expression in the *bldC* mutant compared  
214 to the wild type.

215 In *Streptomyces*, the *ftsW-ftsI* SEDS-PBP gene pair is specifically required for cell division at  
216 sporulation septa (23). Both genes are found in the division and cell wall (*dcw*) gene cluster.  
217 This cluster encodes many proteins that play critical roles in hyphal polar growth,  
218 peptidoglycan biosynthesis and cell division, including DivIVA, SepF, SepG, FtsW and FtsZ.  
219 Closer inspection of the ChIP-seq data showed that BldC binds at multiple positions across  
220 the *dcw* cluster (Fig. 8), although these peaks all fall just below the significance threshold we  
221 applied ( $p < E-04$ ) (Table S1A). The majority of genes within this cluster show a modest  
222 increase in expression (logFC 0.5-1.5) during vegetative growth in the *bldC* mutant relative  
223 to the wild type (Table S1D), suggesting that BldC functions to repress the transcription of  
224 genes within the *dcw* cluster during vegetative growth, in line with the premature initiation of  
225 cell division during sporulation that we observe in a *bldC* mutant.

226 Our data also indicate BldC-mediated repression of other genes with critical roles in cell  
227 division and sporulation such as the *dynAB* operon and *sbgB* (Fig. 5, Table 1). *dynA* and *dynB*  
228 encode two dynamin-like membrane-remodelling proteins that stabilize FtsZ rings during  
229 sporulation septation via protein-protein interactions with other divisome components  
230 including FtsZ, SepF, SepF2 and SsgB (13). In *S. coelicolor*, the actinomycete-specific  
231 proteins SsgA and SsgB positively control the spatial distribution of FtsZ rings during  
232 sporulation-specific cell division. SsgA binds and recruits SsgB, which in turn recruits FtsZ,  
233 determining the future sites of sporulation septation (24). Our data indicate that *sbgB* is a  
234 target of BldC-mediated repression (Table 1).

235

236 **BldC activates the transcription of a subset of target genes**

237 Strikingly, our RNA-seq data also reveal that large numbers of genes are significantly  
238 downregulated in the *bldC* mutant during vegetative growth (Table S1B). Many of these  
239 genes are not direct BldC targets but nevertheless encode proteins important for the formation  
240 of an aerial mycelium, consistent with the bypassing of aerial hypha formation in the *bldC*  
241 mutant (Table S1D). For example, for aerial hyphae to break surface tension and grow into  
242 the air, they must be covered in an extremely hydrophobic sheath that is composed of two  
243 families of developmentally regulated proteins, the chaplins and the rodmins. In wild-type *S.*  
244 *venezuelae*, expression of the *chp* and *rdl* genes is activated at the onset of development, both  
245 on plates and during submerged sporulation (14). In contrast, the *chp* and *rdl* genes were not  
246 activated during submerged sporulation in the *bldC* mutant (Table S1E).

247

248 In addition to these indirect effects, 91 direct BldC target genes showed a greater than 2-fold  
249 reduction in expression ( $\log_{2}FC < -1$ ) in the *bldC* mutant compared to the wild type during  
250 vegetative growth, implying that BldC functions as an activator of these genes (Table S1E  
251 and Fig. 7). Two of these BldC target genes encode the developmental regulators BldM and  
252 WhiH, both of which showed significant down-regulation in the absence of *bldC* during  
253 vegetative growth in the RNA-seq data (Table 1), a result confirmed by qRT-PCR (Fig. 6).  
254 Therefore, BldC functions to activate the transcription of *bldM* and *whiH*, which contrasts  
255 with its repression of other key developmental genes (e.g. *whiI*, *smeA*, *sigF*, *whiD* and *hupS*)  
256 and the observed premature initiation of development in a *bldC* mutant. Our ChIP-seq data  
257 coupled with our RNA-seq data also suggest that BldC binds and activates the transcription  
258 of *ssgA* and *ssgR*, the latter encoding the sporulation-specific activator of *ssgA* (25) (Fig. 5  
259 and Table 1).

260

261 Other noticeable targets of BldC-mediated activation include members of a family of highly  
262 conserved operons, known as the “conservons”. Each conservon (*cvn*) consists of four or five  
263 genes encoding proteins that, based on biochemical studies of Cvn9, may collectively form  
264 complexes of proteins at the membrane with roles in signal transduction (26). Our RNA-seq  
265 data indicate that each of the seven conservons present on the *S. venezuelae* chromosome  
266 (*cvn1*, *cvn2*, *cvn3*, *cvn4*, *cvn5*, *cvn7* and *cvn9*) show a significant reduction in expression  
267 during vegetative growth in the *bldC* mutant compared to the wild type (Table S1D). Two  
268 (*cvn1* and *cvn4*) are direct targets of BldC, as determined by ChIP-seq (Fig. 5, Table 1). The  
269 promoter upstream of *cvn1* is also bound by WhiAB (17) and a *cvn1* mutant of *S. coelicolor*  
270 is impaired in aerial mycelium formation (27), collectively suggesting that Cvn1 (and perhaps  
271 other members of the conservon family) may play a significant but as yet undefined role in  
272 *Streptomyces* differentiation.

273

274 The importance of cyclic-di-GMP (c-di-GMP) in the control of *Streptomyces* differentiation  
275 became clear with the discovery that engineering high levels of this nucleotide second  
276 messenger blocks entry into development, resulting in a classic bald phenotype, whereas  
277 engineering low levels of c-di-GMP causes precocious hypersporulation (5, 9). These  
278 phenotypes arise, at least in part, because the ability of the master repressor, BldD, to  
279 dimerize and repress a suite of sporulation genes during vegetative growth depends on  
280 binding to c-di-GMP (5, 9, 28, 29). c-di-GMP metabolism therefore plays a critical role in  
281 coordinating entry into reproductive growth. c-di-GMP is synthesized from two molecules of  
282 GTP by diguanylate cyclases (DGCs) and our ChIP-seq and RNA-seq data show that  
283 expression of *cdgE*, encoding a predicted DGC, is directly activated by BldC (Fig. 5 and

284 Table 1). *cdgE* is present in at least 90% of *Streptomyces* strains, suggesting the role of this  
285 DGC will be widely conserved in the genus (30).

286

287 *Streptomyces sp.* are noted producers of the terpene 2-methoisoborneol (2-MIB), one of the  
288 volatiles that give soil its characteristic earthy odour. Our RNA-seq data show that expression  
289 of the genes required for 2-MIB biosynthesis (*mibA-mibB*) was significantly reduced in the  
290 *bldC* mutant compared to the wild type (Table S1B). Unexpectedly, the *mibA-mibB* genes  
291 were found to form an operon with *eshA*. *eshA* encodes a putative cyclic nucleotide-binding  
292 protein of unclear function that is not required for the biosynthesis of 2-MIB (31-33). The  
293 effect of BldC on *mibAB* expression is direct. ChIP-seq analysis showed that BldC binds to  
294 the promoter of the *eshA-mibA-mibB* operon (Fig. 5 and Table 1) and that all three genes  
295 show a similar reduction in expression in the *bldC* mutant, indicating that BldC serves to  
296 activate transcription of the operon (Table 1).

297

## 298 **DISCUSSION**

299 Canonical *bld* mutations block entry into development and so the resulting colonies do not  
300 form aerial hyphae and spores. These mutations typically define positive regulators such as  
301 the response regulator BldM (16) or the sigma factor BldN (14). Although our data indicate  
302 that BldC can function as both an activator and a repressor, we have shown that *S. venezuelae*  
303 *bldC* mutants are bald because they enter development prematurely, bypassing the formation  
304 of aerial hyphae, and that this correlates with premature expression of a subset of BldC target  
305 genes with roles in *Streptomyces* differentiation. Thus, phenotypically, BldC functions as a  
306 repressor to sustain vegetative growth and delay entry into development. As such, BldC joins  
307 a growing class of Bld regulators known to function as a developmental “brake” (8).

308 BldD was the first Bld regulator of this alternative class to be clearly recognized. BldD sits at  
309 the top of the developmental cascade and represses a large regulon of ~170 sporulation genes  
310 during vegetative growth. BldD activity is controlled by the second messenger c-di-GMP,  
311 which mediates dimerization of two BldD protomers to generate a functional repressor. In  
312 this way, c-di-GMP signals through BldD to repress expression of the BldD regulon,  
313 extending vegetative growth and inhibiting entry into development (5, 9, 28, 29). Because a  
314 BldD-(c-di-GMP) complex represses the BldD regulon and not BldD alone, engineering the  
315 degradation of c-di-GMP *in vivo* also causes a precocious hypersporulation phenotype like  
316 that of a *bldD* null mutant (9).

317 More recently, *bldO* was identified as a second member of this emerging class of *bld* mutant  
318 (7, 8). In contrast to BldD and BldC, which both control large regulons, BldO functions to  
319 repress a single developmental gene, *whiB*. The precocious hypersporulation phenotype of  
320 the *bldO* mutant arises from premature expression of *whiB*, and in line with this, constitutive  
321 expression of *whiB* alone is sufficient to induce precocious hypersporulation in wild-type *S.*  
322 *venezuelae* (7). WhiA and WhiB act together to co-control the same set of promoters to  
323 initiate developmental cell division in *Streptomyces* (15, 17). WhiA is constitutively present  
324 throughout the life cycle, but it only binds to its target promoters at the onset of sporulation  
325 when WhiB is present (15, 17). This is because WhiA and WhiB function cooperatively and  
326 *in vivo* DNA binding by WhiA depends on WhiB, and *vice versa* (17). As a consequence, the  
327 regulation of *whiB* expression is key in controlling the switch between hyphal growth and  
328 sporulation. This critical role for WhiB is reflected in the extensive developmental regulation  
329 to which *whiB* transcription is subject, being directly repressed by BldC, BldD (28) and BldO  
330 (7), and directly activated by BldM (16).

331

332 BldC-family members radiate throughout the bacterial domain. Interestingly, some BldC  
333 orthologs are annotated as possible DNA resolvase/integrase-associated proteins, consistent  
334 with the structural similarity observed between BldC and Xis (11, 34). Xis is a DNA  
335 architectural protein that mediates the formation of a nucleoprotein complex required for the  
336 phage-encoded Int recombinase/integrase to catalyse the site-specific recombination event  
337 that leads to the excision of phage lambda from the *E. coli* chromosome. Like BldC, Xis  
338 binds to DNA in a head-tail fashion to generate a nucleoprotein filament, leading to distortion  
339 of the DNA (34). Thus, BldC may represent an evolutionary link between transcription  
340 factors of the MerR family and DNA architectural proteins (11).

341

342 There is an interesting analogy between the relationship of BldC to MerR and the relationship  
343 of Fis to NtrC. Fis is a 98-residue nucleoid-associated protein found in proteobacteria that is  
344 closely related to the DNA-binding domain of the much larger bacterial enhancer-binding  
345 protein NtrC (35-37). Like BldC, Fis prefers binding to A+T-rich DNA and its interaction  
346 with DNA is affected by the width of the minor groove (38). Fis can function in the cell as  
347 an architectural protein in the nucleoid, but it can also function as a transcription factor (39,  
348 40). Like BldC, Fis exerts a global influence on the transcription profile of the cell and can  
349 have positive or negative effects on the activity of its target promoters (41). Fis does not bind  
350 a ligand and it is not known to be controlled by post-translational modification. Instead, its  
351 influence appears simply to reflect Fis protein concentration, which is high in early log phase  
352 but low at other growth stages. In the future, it will be interesting to determine if the activity  
353 of BldC is controlled post-translationally, or whether BldC function is more akin to that of  
354 nucleoid-associated proteins like Fis.

355

356 **MATERIALS AND METHODS**



357 **Construction and complementation of an *S. venezuelae bldC* null mutant.** Using  
358 ‘Redirect’ PCR targeting (42, 43), *bldC* mutants were generated in which the coding region  
359 was replaced with a single apramycin resistance (*apr*) cassette. A cosmid library that covers >  
360 98% of the *S. venezuelae* genome (M.J. Bibb and M.J. Buttner, unpublished) is fully  
361 documented at <http://strepdb.streptomyces.org.uk/>. Cosmid 4O24 was introduced into *E. coli*  
362 BW25113 containing pIJ790 and the *bldC* gene (*sven3846*) was replaced with the *apr-oriT*  
363 cassette amplified from pIJ773 using the primer pairs bldCdis\_F and bldCdis\_R. The  
364 resulting disrupted cosmids were confirmed by restriction digestion and by PCR analysis  
365 using the flanking primers bldCcon\_F and bldCcon\_R, and introduced into *S. venezuelae* by  
366 conjugation (44). Null mutant derivatives, generated by double crossing over, were identified  
367 by their apramycin-resistant, kanamycin-sensitive and morphological phenotypes, and their  
368 chromosomal structures were confirmed by PCR analysis using the flanking primers  
369 bldCcon\_F and bldCcon\_R. A representative *bldC* null mutant was designated SV25. For  
370 complementation, *bldC* was amplified with the primers bldCcomp\_F and bldCcomp\_R,  
371 generating an 846bp fragment carrying the coding sequence and the *bldC* promoter, and  
372 cloned into HindIII-KpnI/Asp718 cut pIJ10770 to create pIJ10618. The plasmid was  
373 introduced into the *bldC* mutant by conjugation and fully complemented all aspects of the  
374 mutant phenotype.

375

376 **Time-lapse imaging of *S. venezuelae*.** Fluorescent time-lapse imaging was conducted  
377 essentially as described previously (7, 12, 13). Before imaging, fresh *S. venezuelae* spores for  
378 each of the strains imaged were first prepared by inoculating 30 ml cultures of MYM with 10  
379 µl of the appropriate spore stock or 20 µl of the appropriate mycelial culture. Cells were  
380 cultured at 30 °C and 250 rpm until fully differentiated (16-24 h for hypersporulating strains,  
381 otherwise 36-40 h). 1 ml of each culture was spun briefly to pellet mycelium, the supernatant

382 spores were diluted 1:50 in fresh MYM, and 50  $\mu$ l was transferred to the cell loading well of  
383 a prepared B04A microfluidic plate (Merck-Millipore). The remaining culture was filter-  
384 sterilized to obtain spent MYM that was free of spores and mycelial fragments. The ONIX  
385 manifold was then sealed to the B04A plate before transferring to the environmental  
386 chamber, pre-incubated at 30 °C. Spores were loaded onto the B04A plate, at 4 psi for 15  
387 seconds using the ONIX microfluidic perfusion system. Fresh MYM medium was set to flow  
388 at 2 psi during the first 3 hours during germination, before the 2-psi flow of spent MYM  
389 medium for the remainder of the experiment. The system was left to equilibrate for 1 h prior  
390 to imaging.

391

392 Imaging was conducted using a Zeiss Axio Observer.Z1 widefield microscope equipped with  
393 a sCMOS camera (Hamamatsu Orca FLASH 4), a metal-halide lamp (HXP 120V), a  
394 hardware autofocus (Definitive Focus), a 96-well stage insert, an environmental chamber, a  
395 100x 1.46 NA Oil DIC objective and the Zeiss 46 HE shift free (excitation500/25 nm,  
396 emission 535/30 nm) filter set. DIC images were captured with a 150 ms exposure time, YFP  
397 images were captured with a 100 ms exposure time. Images were taken every 30 min. In all  
398 experiments, multiple x/y positions were imaged for each strain and in each experiment.  
399 Representative images were transferred to the Fiji software package (<http://fiji.sc/Fiji>),  
400 manipulated and converted into the movie files presented here, as described previously (12).

401

402 **ChIP-seq, RNA-seq, qRT-PCR, Western blotting and scanning electron microscopy** See  
403 Supplemental Materials and Methods (Text S1).

404

405

406 **FUNDING INFORMATION**

407 This work was funded by BBSRC grant BB/H006125/1 (to M.J.B.) and by BBSRC Institute  
408 Strategic Programme Grant BB/J004561/1 to the John Innes Centre. The funders had no role  
409 in study design, data collection and interpretation, or the decision to submit the work for  
410 publication.

411

412 **ACKNOWLEDGEMENTS**

413 We are grateful to Ray Dixon and Charlie Dorman for helpful discussion, and to Genewiz for  
414 expert handling of the ChIP and RNA samples.

415

416 **REFERENCES**

- 417 1. Flärdh K, Buttner MJ. 2009. *Streptomyces* morphogenetics: dissecting differentiation in a  
418 filamentous bacterium. *Nat Rev Microbiol* 7:36-49.
- 419 2. McCormick JR, Flärdh K. 2012. Signals and regulators that govern *Streptomyces*  
420 development. *FEMS Microbiol Rev* 36:206-231.
- 421 3. McCormick JR. 2009. Cell division is dispensable but not irrelevant in *Streptomyces*.  
422 *Curr Opin Microbiol* 12:689-698.
- 423 4. Jakimowicz D, and van Wezel GP. 2012. Cell division and DNA segregation in  
424 *Streptomyces*: how to build a septum in the middle of nowhere? *Mol Microbiol* 85:393-  
425 404.
- 426 5. Bush MJ, Tschowri N, Schlimpert S, Flärdh K, Buttner MJ. 2015. c-di-GMP signaling  
427 and the regulation of developmental transitions in *Streptomyces*. *Nat Rev Microbiol*  
428 13:749-760.
- 429 6. Chater KF. 2016. Recent advances in understanding *Streptomyces*. *F1000Res* 5:2795.
- 430 7. Bush MJ, Chandra G, Findlay KC, Buttner MJ. 2017. Multi-layered inhibition of  
431 *Streptomyces* development: BldO is a dedicated repressor of whiB. *Mol. Microbiol.*  
432 104:700-711.
- 433 8. Flärdh K, McCormick JR. 2017. The *Streptomyces* O-B one connection: a force within  
434 layered repression of a key developmental decision. *Mol. Microbiol* 104:695-699.
- 435 9. Tschowri N, Schumacher MA, Schlimpert S, Chinnam NB, Findlay KC, Brennan RG,  
436 Buttner MJ. 2014. Tetrameric c-di-GMP mediates effective transcription factor  
437 dimerization to control *Streptomyces* development. *Cell* 158:1136-1147.
- 438 10. Hunt AC, Servin-Gonzalez L, Kelemen GH, Buttner MJ. 2005. The bldC developmental  
439 locus of *Streptomyces coelicolor* encodes a member of a family of small DNA-binding  
440 proteins related to the DNA-binding domains of the MerR family. *J Bacteriol* 187:716-

441 728.

- 442 11. Schumacher MA, den Hengst CD, Bush MJ, Le TB, Tran NT, Chandra G, Zeng W,  
443 Travis B, Brennan RG, Buttner MJ. 2018. The MerR-like protein BldC binds DNA direct  
444 repeats as cooperative multimers to regulate *Streptomyces* development. *Nature*  
445 *Commun.* 9:1139.
- 446 12. Schlimpert S, Flårdh K, Buttner, MJ. 2016. Fluorescence time-lapse imaging of the  
447 complete *Streptomyces* life cycle using a microfluidic device. *J Vis Exp* 108:e53863.
- 448 13. Schlimpert S, Wasserstrom S, Chandra G, Bibb MJ, Findlay KC, Flårdh K, Buttner MJ.  
449 2017. Two dynamin-like proteins stabilize FtsZ rings during *Streptomyces* sporulation.  
450 *Proc Natl Acad Sci U S A* 114:E6176-E6183.
- 451 14. Bibb MJ, Domonkos A, Chandra G, Buttner MJ. 2012. Expression of the chaplin and  
452 rodlin hydrophobic sheath proteins in *Streptomyces venezuelae* is controlled by  $\sigma^{\text{BldN}}$  and  
453 a cognate anti-sigma factor, RsbN. *Mol. Microbiol.* 84:1033–1049.
- 454 15. Bush MJ, Bibb MJ, Chandra G, Findlay KC, Buttner MJ. 2013. Genes required for aerial  
455 growth, cell division, and chromosome segregation are targets of WhiA before  
456 sporulation in *Streptomyces venezuelae*. *mBio* 4:e00684-13.
- 457 16. Al-Bassam MM, Bibb MJ, Bush MJ, Chandra G, Buttner MJ. 2014. Response regulator  
458 heterodimer formation controls a key stage in *Streptomyces* development. *PLoS Genet*  
459 10:e1004554.
- 460 17. Bush MJ, Chandra G, Bibb MJ, Findlay KC, Buttner MJ. 2016. Genome-wide chromatin  
461 immunoprecipitation sequencing analysis shows that WhiB is a transcription factor that  
462 co-controls its regulon with WhiA to initiate developmental cell division in *Streptomyces*.  
463 *mBio* 7:e00523-16.

- 464 18. Ausmees N, Wahlstedt H, Bagchi S, Elliot MA, Buttner MJ, Flårdh K. 2007. SmeA, a  
465 small membrane protein with multiple functions in *Streptomyces* sporulation including  
466 targeting of a SpoIIIE/FtsK-like protein to cell division septa. *Mol Microbiol* 65:1458-  
467 1473.
- 468 19. Macheboeuf P, Contreras-Martel C, Job V, Dideberg O, Dessen A. 2006. Penicillin  
469 binding proteins: key players in bacterial cell cycle and drug resistance processes.  
470 *FEMS Microbiol. Rev.* 30:673-691.
- 471 20. Sauvage E, Kerff F, Terrak M, Ayala JA, Charlier P. 2008. The penicillin-binding  
472 proteins: structure and role in peptidoglycan biosynthesis. *FEMS Microbiol. Rev.* 32:234-  
473 258.
- 474 21. Typas A, Banzhaf M, Gross CA, Vollmer W. 2011. From the regulation of peptidoglycan  
475 synthesis to bacterial growth and morphology. *Nat Rev Microbiol.* 10:123-36.
- 476 22. Mercer KL, Weiss DS. 2002. The *Escherichia coli* cell division protein FtsW is required  
477 to recruit its cognate transpeptidase, FtsI (PBP3), to the division site. *J Bacteriol.*  
478 184:904-12.
- 479 23. Mistry BV, Del Sol R, Wright C, Findlay K, Dyson P. 2008. FtsW is a dispensable cell  
480 division protein required for Z-ring stabilization during sporulation septation in  
481 *Streptomyces coelicolor*. *J Bacteriol.* 190:5555-66.
- 482 24. Willemsse J, Borst JW, de Waal E, Bisseling T, van Wezel GP 2011. Positive control of  
483 cell division: FtsZ is recruited by SsgB during sporulation of *Streptomyces*. *Genes Dev*  
484 25:89-99.
- 485 25. Traag BA, Kelemen GH, Van Wezel GP. 2004. Transcription of the sporulation gene  
486 *ssgA* is activated by the IclR-type regulator SsgR in a *whi*-independent manner in  
487 *Streptomyces coelicolor* A3(2). *Mol Microbiol.* 53:985-1000.

- 488 26. Komatsu M, Takano H, Hiratsuka T, Ishigaki Y, Shimada K, Beppu T, Ueda K. 2006.  
489 Proteins encoded by the conservon of *Streptomyces coelicolor* A3(2) comprise a  
490 membrane-associated heterocomplex that resembles eukaryotic G protein-coupled  
491 regulatory system. *Mol Microbiol* 62:1534-46.
- 492 27. Takano H, Hashimoto K, Yamamoto Y, Beppu T, Ueda K. 2011. Pleiotropic effect of a  
493 null mutation in the *cvnI* conservon of *Streptomyces coelicolor* A3(2). *Gene* 477:12-8.
- 494 28. den Hengst CD, Tran NT, Bibb MJ, Chandra C, Leskiw BK, Buttner MJ. 2010. Genes  
495 essential for morphological development and antibiotic production in *Streptomyces*  
496 *coelicolor* are targets of BldD during vegetative growth. *Mol Microbiol* 78:361-379.
- 497 29. Schumacher MA, Zeng W, Findlay KC, Buttner MJ, Brennan RG, Tschowri N. 2017. The  
498 *Streptomyces* master regulator BldD binds c-di-GMP sequentially to create a functional  
499 BldD<sub>2</sub>-(c-di-GMP)<sub>4</sub> complex. *Nucleic Acids Res* 45:6923-6933.
- 500 30. Al-Bassam MM, Haist J, Neumann SA, Lindenberg S, Tschowri N. 2018. Expression  
501 patterns, genomic conservation and input into developmental regulation of the  
502 GGDEF/EAL/HD-GYP domain proteins in *Streptomyces*. *Front Microbiol* 9:2524.
- 503 31. Saito N, Matsubara K, Watanabe M, Kato F, Ochi K. 2003. Genetic and biochemical  
504 characterization of EshA, a protein that forms large multimers and affects developmental  
505 processes in *Streptomyces griseus*. *J Biol Chem* 278:5902-5911.
- 506 32. Komatsu M, Tsuda M, Omura S, Oikawa H, Ikeda H. 2008. Identification and functional  
507 analysis of genes controlling biosynthesis of 2-methylisoborneol. *Proc Natl Acad Sci U S*  
508 *A* 105:7422-7.
- 509 33. Wang CM, Cane DE. 2008. Biochemistry and molecular genetics of the biosynthesis of  
510 the earthy odorant methylisoborneol in *Streptomyces coelicolor*. *J Am Chem Soc.*  
511 130:8908-9.

- 512 34. Abbani MA, Papagiannis CV, Sam MD, Cascio D, Johnson RC, Clubb RT. 2007.  
513 Structure of the cooperative Xis-DNA complex reveals a micronucleoprotein filament  
514 that regulates phage lambda intasome assembly. *Proc Natl Acad Sci U S A* 104:2109-14.
- 515 35. Morett E, Bork P. 1998. Evolution of new protein function: Recombinational enhancer  
516 FIS originated by horizontal gene transfer from the transcriptional regulator NtrC. *FEBS*  
517 *Letters* 433:108-112.
- 518 36. Kostrewa D, Granzin J, Koch C, Choe HW, Raghunathan S, Wolf W, Labahn J,  
519 Kahmann R, Saenger W. 1991. Three-dimensional structure of the *E. coli* DNA-binding  
520 protein FIS. *Nature* 349:178–180.
- 521 37. Pelton JG, Kustu S, Wemmer DE. 1999. Solution structure of the DNA-binding domain  
522 of NtrC with three alanine substitutions. *J Mol Biol* 292:1095-110.
- 523 38. Stella S, Cascio D, Johnson RC. 2010. The shape of the DNA minor groove directs  
524 binding by the DNA-bending protein Fis. *Genes Dev* 24:814–826.
- 525 39. Dame RT. 2005. The role of nucleoid-associated proteins in the organization and  
526 compaction of bacterial chromatin. *Mol Microbiol* 56:858-70.
- 527 40. Dorman CJ. 2014. Function of nucleoid-associated proteins in chromosome structuring  
528 and transcriptional regulation. *J Mol Microbiol Biotechnol.* 24:316-31.
- 529 41. Kahramanoglou C, Seshasayee AS, Prieto AI, Ibberson D, Schmidt S, Zimmermann J,  
530 Benes V, Fraser GM, Luscombe NM. 2011. Direct and indirect effects of H-NS and Fis  
531 on global gene expression control in *Escherichia coli*. *Nucleic Acids Res* 39:2073–2091.
- 532 42. Gust B, Challis GL, Fowler K, Kieser T, Chater KF. 2003 PCR-targeted *Streptomyces*  
533 gene replacement identifies a protein domain needed for biosynthesis of the sesquiterpene  
534 soil odor geosmin. *Proc Natl Acad Sci USA* 100:1541-1546.



- 535 43. Gust B, Chandra G, Jakimowicz D, Yuqing T, Bruton C, Chater KF. 2004. Lambda red-  
536 mediated genetic manipulation of antibiotic-producing *Streptomyces*. *Adv Appl*  
537 *Microbiol* 54: 107-128.
- 538 44. Kieser T, Bibb MJ, Buttner MJ, Chater KF, Hopwood DA. 2000. *Practical Streptomyces*  
539 *genetics*. The John Innes Foundation, Norwich, United Kingdom.
- 540

## 541 **FIGURE LEGENDS**

542 **FIG 1.** BldC is required for the formation of aerial mycelium. Wild-type *S.venezuelae*, the  
543 *bldC* mutant, the *bldC* mutant carrying the empty vector, and the complemented *bldC* mutant,  
544 photographed after four days of growth on MYM solid medium.

545

546 **FIG 2.** Deletion of *bldC* causes premature initiation of development on solid medium.  
547 Scanning electron micrographs showing the phenotypes of the *bldC* mutant and the wild type  
548 after one, two and three days of growth on MYM solid medium. The phenotype of the  
549 complemented *bldC* mutant is also shown after 3 days of growth on MYM solid medium.

550

551 **FIG 3.** Deletion of *bldC* causes premature initiation of development in liquid medium. Time-  
552 lapse images (4, 7, 12 and 21 h post-inoculation) of (A) wild-type *S. venezuelae*, (B) the *bldC*  
553 mutant, and (C) the complemented *bldC* mutant, grown in liquid MYM medium in the  
554 microfluidic system. All three strains carry the same FtsZ-YPet translational fusion expressed  
555 from the native *ftsZ* promoter, and both the DIC (upper) and fluorescence (lower) images are  
556 shown. Scale Bar = 10µm. For the corresponding movies, please see Supporting Information  
557 Movies S1A/B, S2A/B and S3 A/B.

558

559 **FIG 4.** Automated Western blot analysis of BldC levels during submerged sporulation in  
560 MYM liquid medium. Equal amounts (1  $\mu$ g) of total protein were loaded for each sample and  
561 BldC was detected with a polyclonal antibody using the quantitative ‘Wes’ capillary  
562 electrophoresis and blotting system (ProteinSimple – San Jose, CA). The *S. venezuelae bldC*  
563 mutant was used as a negative control. (A) quantitation of BldC levels (area under each peak;  
564 arbitrary units). (B) virtual Western blot. All experimental samples were analysed in triplicate  
565 and the mean value and its Standard Error are shown for each sample. Each time point is  
566 indicated in hours, along with its relation to the developmental stage (V = vegetative growth;  
567 F = fragmentation; S = sporulation), as determined by microscopy. Cultures used to analyse  
568 BldC levels were identical to those used to prepare RNA prior to qRT-PCR analysis (Fig. 6).

569

570 **FIG 5.** BldC ChIP-seq in *S. venezuelae*. ChIP traces are shown for 12 selected BldC target  
571 genes/operons: *eshA-mibAB*, *wblA*, *ssgR-ssgA*, *dynAB*, *smeA-sffA*, *vnz23255*, *sigI*, *vnz24690-*  
572 *24685*, *whiI*, *cvnA4-D4*, *cvnA1-D1* and *cdgE*. Color-coding of the ChIP samples is as follows:  
573 *S. venezuelae* wild type 10 hr (WT 10 hr, red), *S. venezuelae* wild type 10hr (WT 14 hr,  
574 green) and  $\Delta bldC$  mutant 14 hr ( $\Delta bldC$ , black). Plots span approximately 5 kb of DNA  
575 sequence. Genes running left to right are shown in green, and genes running right to left are  
576 shown in red. The black arrow indicates the gene of interest subject to BldC regulation.

577

578 **FIG 6.** qRT-PCR data showing mRNA abundance for the BldC target genes *whiI*, *smeA*,  
579 *sigF*, *whiD*, *hupS*, *whiH* and *bldM* in the wild type (white bars) and the *bldC* mutant (black  
580 bars). Strains were grown in MYM liquid medium. Expression values were calculated  
581 relative to the accumulation of the constitutively expressed *hrdB* reference mRNA and  
582 normalized to the wild type value at 10 h.

583

584 **FIG 7.** Volcano plots of the RNA-seq data at the 10 hr (left panel) and 14 hr (right panel)  
585 time points with significance ( $-\log_{10}$  P-value) plotted against differential expression (log fold  
586 change). The thresholds for significant differential expression ( $>1$  or  $<-1$  log fold change) are  
587 indicated via vertical dashed lines. Genes with log fold change  $>1/<-1$  show at least a two-  
588 fold increase/decrease in expression in the  $\Delta bldC$  mutant relative to the wild type. Genes that  
589 are BldC ChIP-seq targets in *S. venezuelae* are indicated by red dots.

590

591 **FIG 8.** BldC binds at multiple positions across the *dcw* operon. The genes found in the *dcw*  
592 cluster are annotated. Color-coding of the ChIP samples is as follows: *S. venezuelae* wild type  
593 10 hr (WT 10 hr, red), *S. venezuelae* wild type 14 hr (WT 14 hr, green) and  $\Delta bldC$  mutant 14  
594 hr ( $\Delta bldC$ , black). Genes running left to right are shown in green, and genes running right to  
595 left are shown in red. The black arrows indicate BldC binding sites identified in this analysis.

596

597 **Table 1.** Selected BldC ChIP-seq targets. Listed is the minimum p-value for the ChIP-seq  
598 peak, the gene and the gene product. For each target, the RNA-seq data, showing the relative  
599 expression values (logFC) for the  $\Delta bldC$  mutant compared to the wild type at the 10 hr and  
600 14 hr time points is also listed. Significant increases in relative expression ( $>1$ ) are indicated  
601 in red. Significant decreases in relative expression ( $<-1$ ) are indicated in yellow. Where BldC  
602 binding is likely to exert control over multiple genes in a single operon, the data for these  
603 genes is also listed.

604

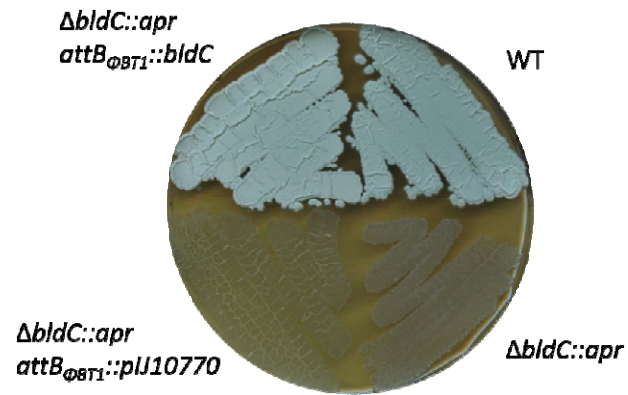

605 **FIG**

**1.**

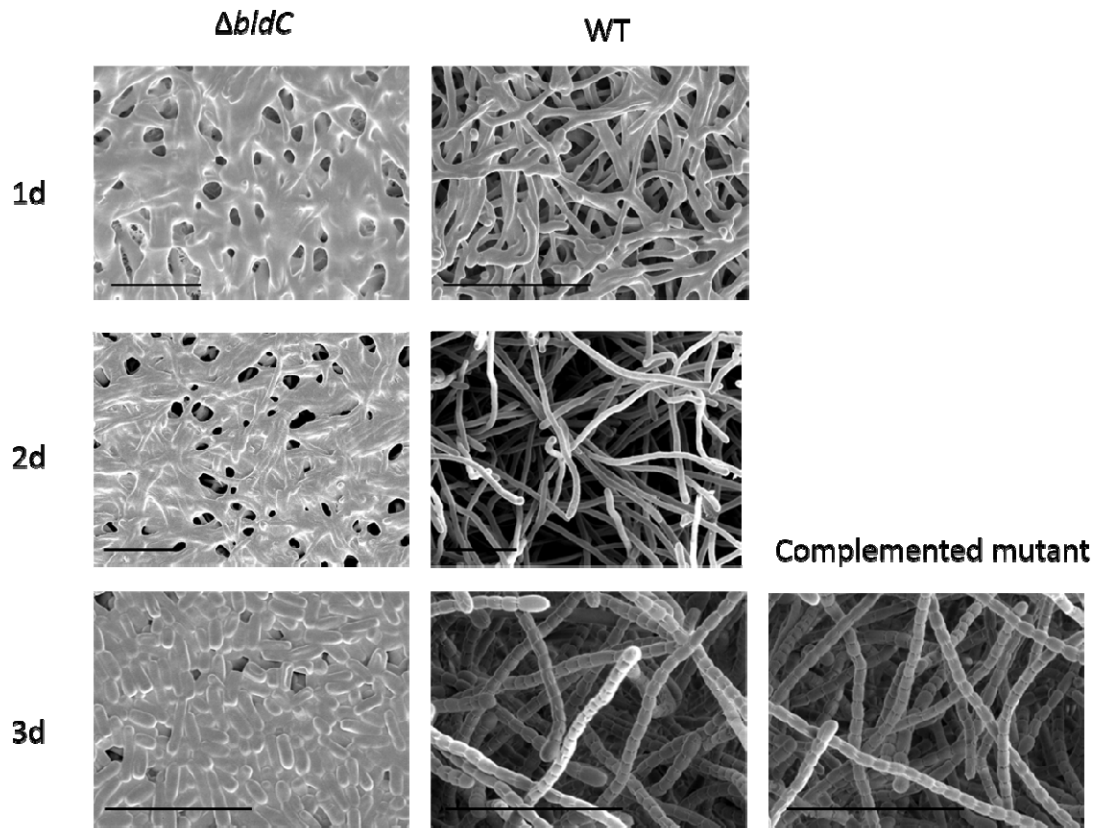

Scale Bar = 10  $\mu$ m

606

607 **FIG 2.**

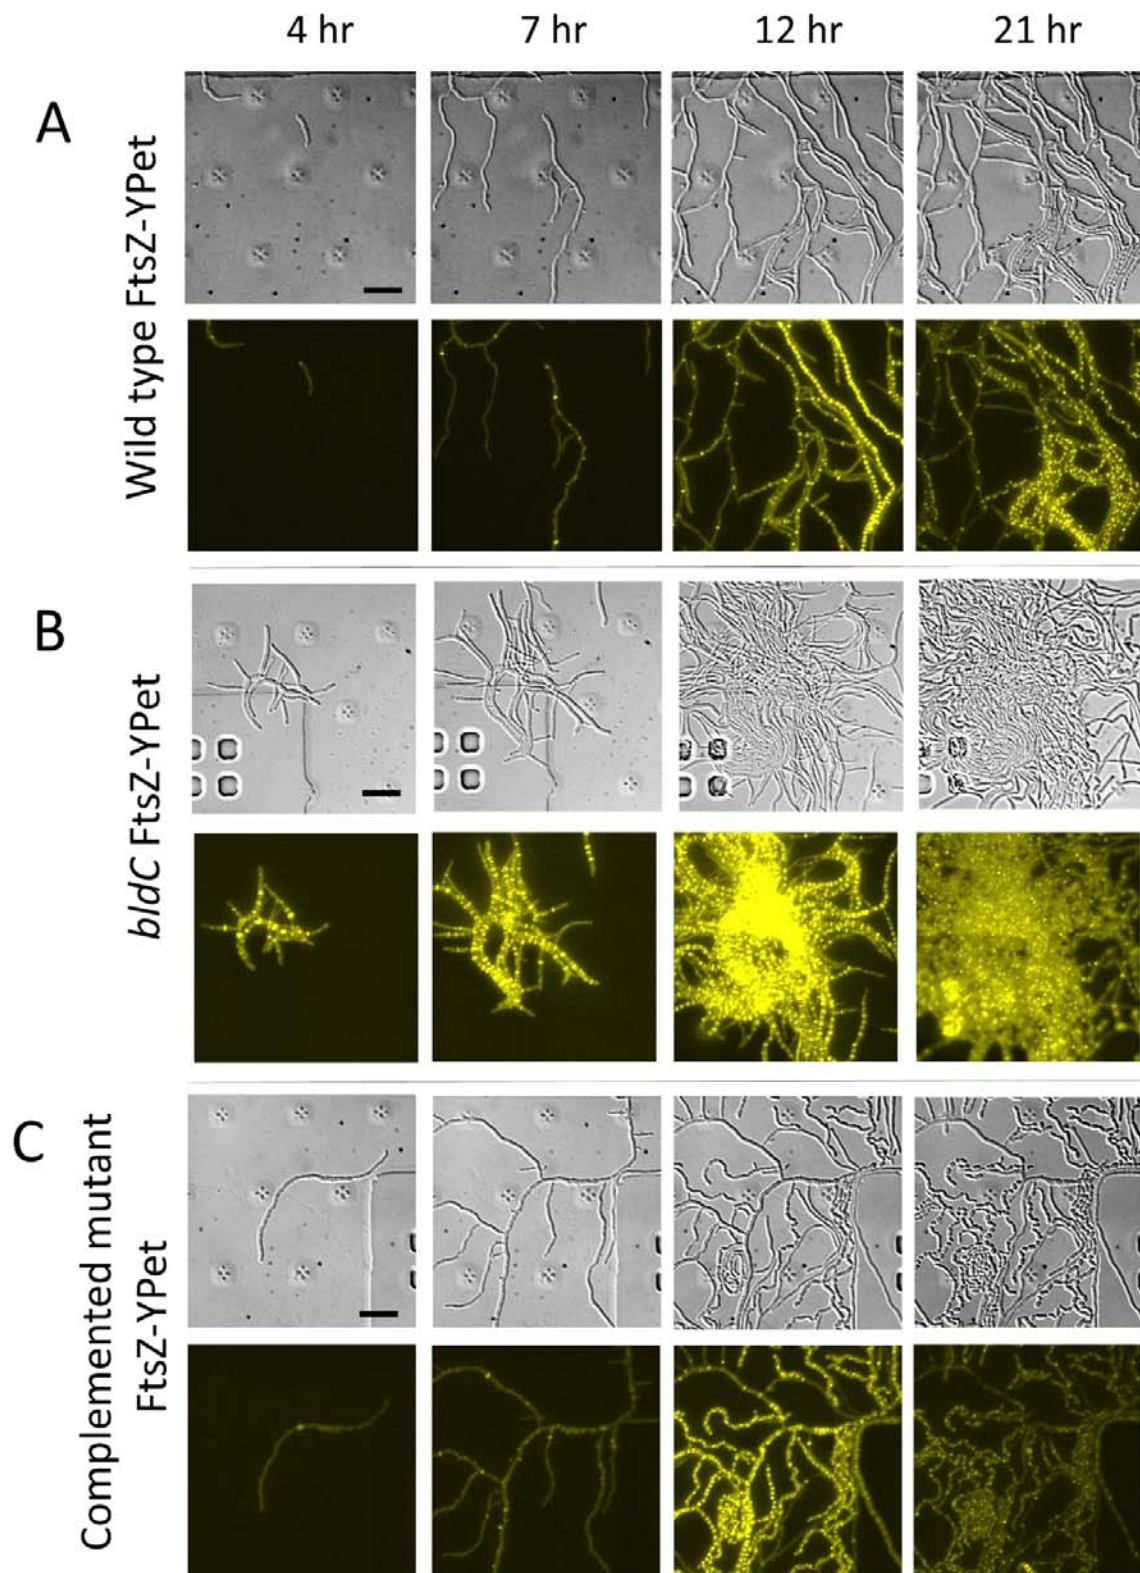

**FIG 3.**

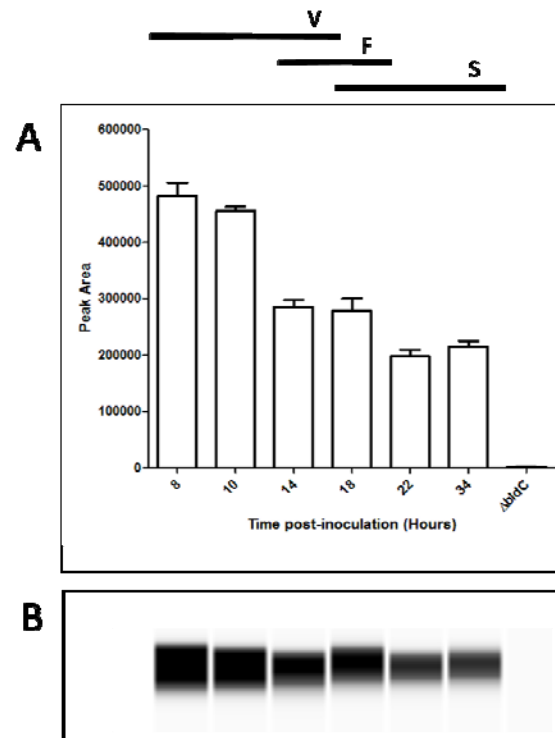

608 FIG 4.

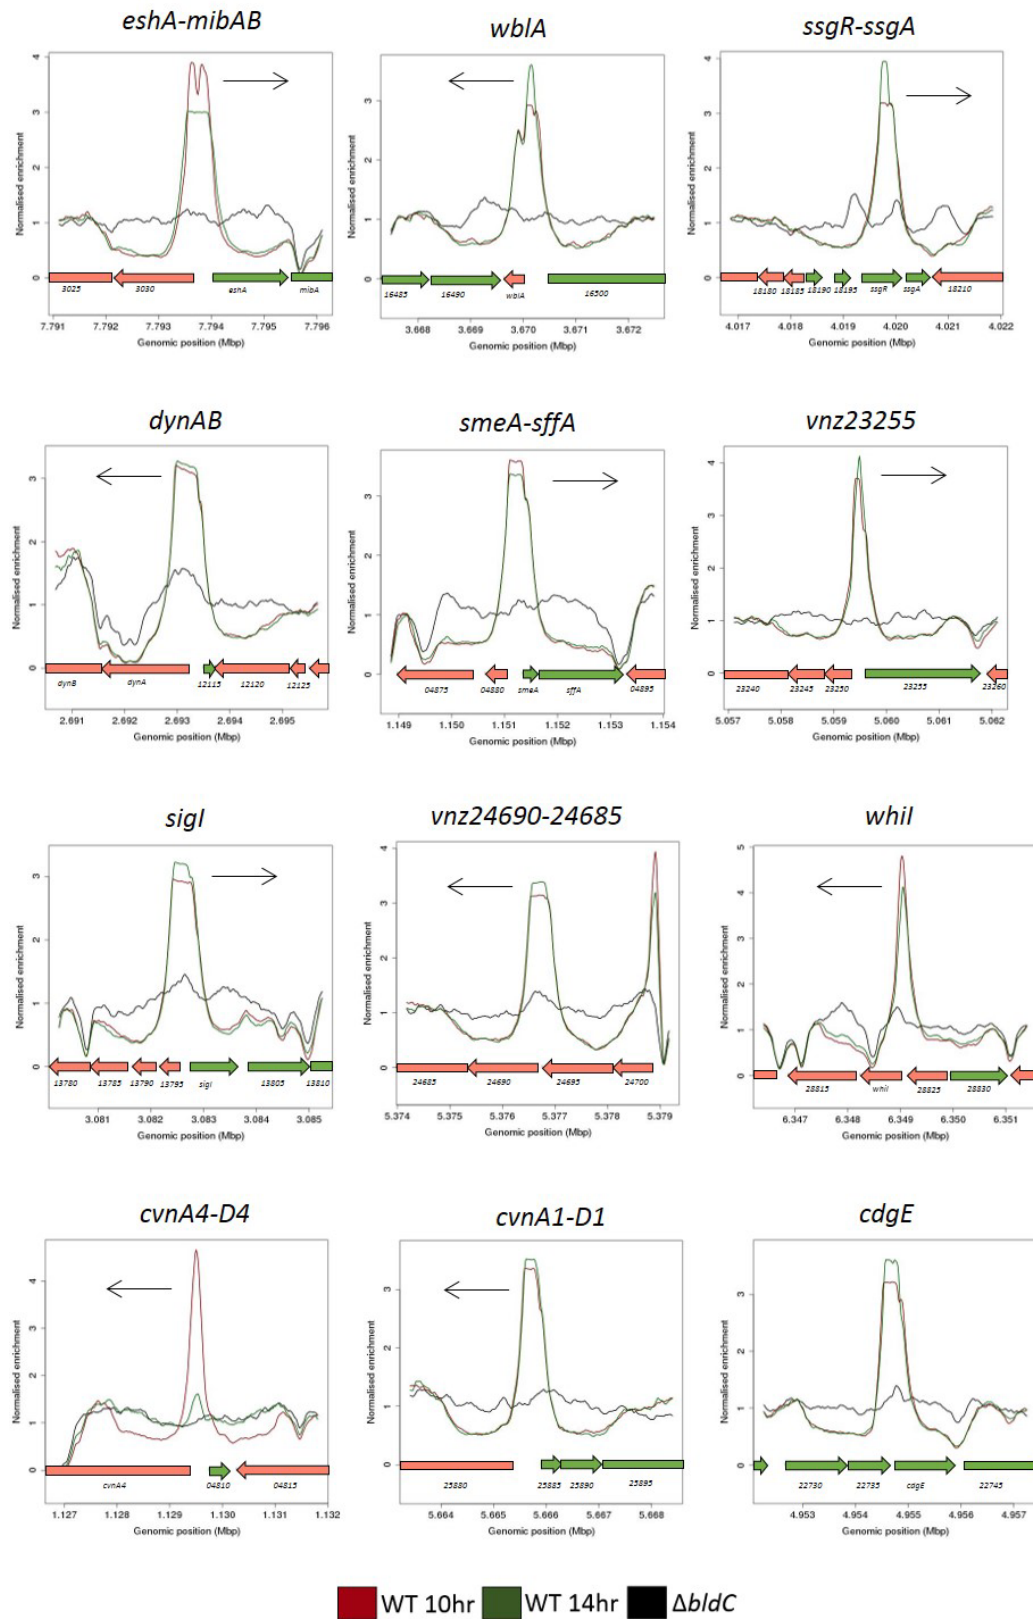

**FIG 5.**



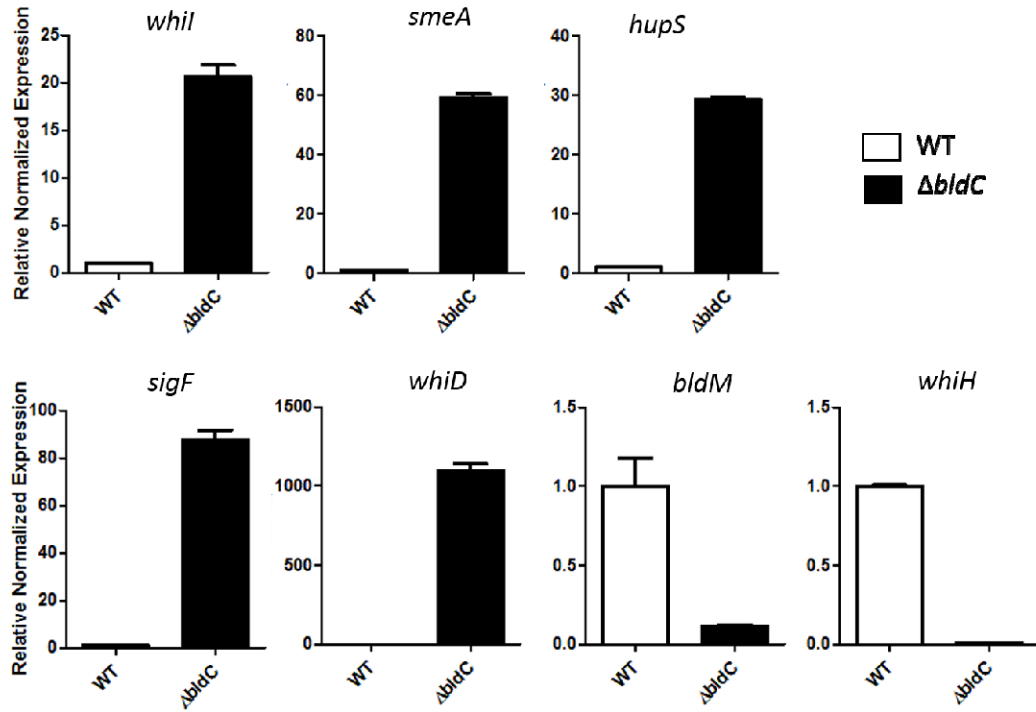

609 **FIG 6.**

610

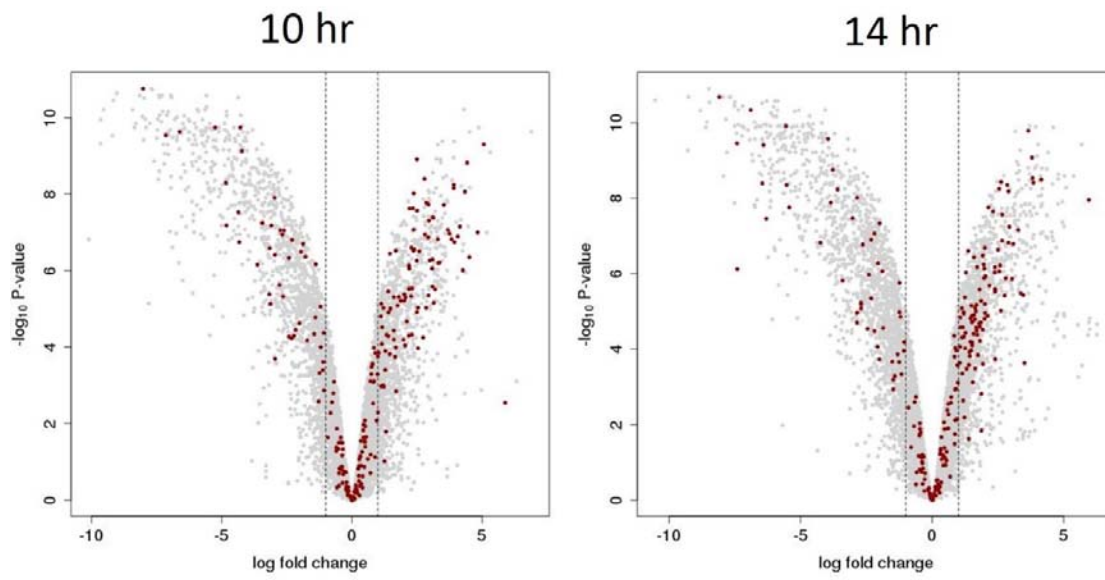

611 **FIG 7.**

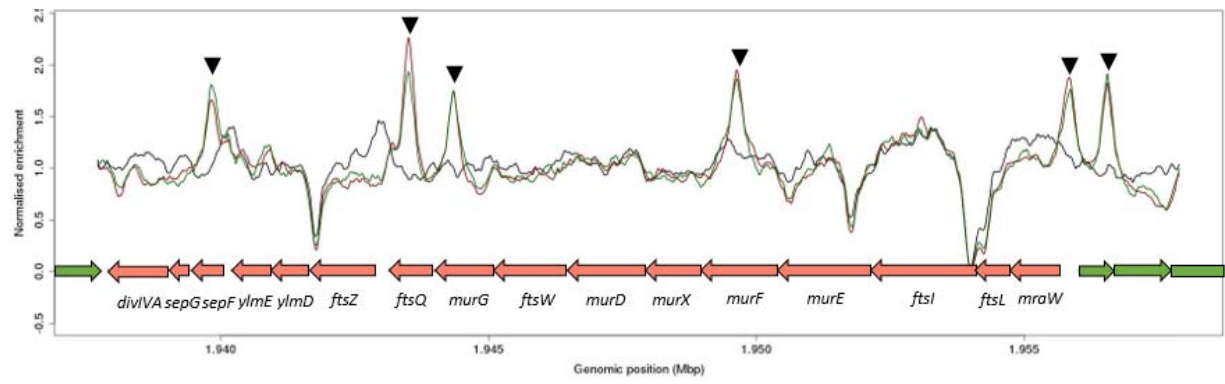

612

**FIG 8.**

613

| min apv  | Gene      | Product                    | LogFC 10hr | LogFC 14hr |
|----------|-----------|----------------------------|------------|------------|
| 2.42E-10 | vnz_18945 | BldC                       | -          | -          |
| 3.03E-18 | vnz_35035 | EshA                       | -8.1457    | -5.3406    |
|          | vnz_35040 | MibA                       | -4.8905    | -2.8033    |
|          | vnz_35045 | MibB                       | -6.4229    | -5.1941    |
| 3.19E-17 | vnz_16495 | WblA                       | -4.3602    | -5.5303    |
| 1.4E-06  | vnz_27205 | WhiH                       | -4.2208    | -3.7707    |
| 1.33E-07 | vnz_22005 | BldM                       | -2.6717    | -3.0249    |
| 5.39E-22 | vnz_18205 | SsgA                       | -1.8093    | -0.5592    |
|          | vnz_18200 | SsgR                       | -2.2995    | -2.3179    |
| 4.48E-32 | vnz_04805 | CvnA4                      | -0.1815    | -2.1394    |
|          | vnz_04800 | CvnB4                      | 0.0016     | -2.6155    |
|          | vnz_04795 | CvnC4                      | 0.1926     | -2.5418    |
|          | vnz_04790 | CvnD4                      | -0.1034    | -2.7909    |
| 3.37E-15 | vnz_25880 | CvnA1                      | 0.0094     | -1.1536    |
|          | vnz_25875 | CvnB1                      | -0.0808    | -1.5193    |
|          | vnz_25870 | CvnC1                      | -0.1607    | -2.2575    |
|          | vnz_25865 | CvnD1                      | -0.0979    | -2.2674    |
| 1.33E-07 | vnz_22000 | WhiD                       | 6.8916     | 2.4359     |
| 1.33E-15 | vnz_18620 | SigF                       | 4.4232     | 3.8513     |
| 2.52E-07 | vnz_12110 | DynA                       | 3.0967     | 2.3950     |
|          | vnz_12105 | DynB                       | 3.1842     | 2.1040     |
| 1.23E-12 | vnz_04885 | SmeA                       | 2.7343     | 0.1379     |
|          | vnz_04890 | SffA                       | 2.7046     | 0.3368     |
| 2.33E-12 | vnz_05545 | SsgB                       | 2.5471     | 0.7373     |
| 4.06E-09 | vnz_13800 | SigI                       | 2.5392     | 2.7563     |
| 1.48E-09 | vnz_24690 | FtsW-like                  | 2.4867     | 1.8583     |
|          | vnz_24685 | penicillin-binding protein | 2.1361     | 2.0431     |
| 2.5E-15  | vnz_22740 | CdgE                       | 2.2747     | 2.0130     |
| 1.87E-27 | vnz_28820 | WhiI                       | 1.9805     | 3.0348     |
| 1.22E-35 | vnz_12970 | penicillin-binding protein | 1.8746     | 1.6578     |
| 7.74E-05 | vnz_25950 | HupS                       | 1.8591     | 1.4814     |
| 7.17E-25 | vnz_23255 | penicillin-binding protein | 1.4519     | 1.4785     |
| 1.04E-17 | vnz_15130 | penicillin-binding protein | 0.8151     | 0.7076     |
| 4.46E-06 | vnz_13645 | WhiB                       | 0.6179     | 0.5096     |

614

615 **Table 1.**

616 **SUPPLEMENTAL FIGURE AND TABLE LEGENDS**

617 **Text S1.** Supplemental Materials and Methods.

618 **FIG S1.** BldC ChIP-seq peaks fall into two classes. BldC binding upstream of some targets  
619 generates a broad region of enrichment. For *smeA*, this likely corresponds with the binding of  
620 four direct repeats by BldC, observed *in vitro* (Schumacher MA, den Hengst CD, Bush MJ,  
621 Le TBK, Tran NT, Chandra G, Zeng W, Travis B, Brennan RG, Buttner MJ. Nat Commun.  
622 2018 9:1139. doi: 10.1038/s41467-018-03576-3). Other BldC ChIP-seq targets e.g. *cdgE*,  
623 *dynAB* display similarly broad regions of enrichment and examination of the nucleotide  
624 sequence in these regions likewise reveals four similar and appropriately spaced direct  
625 repeats. At other BldC ChIP-seq targets, much narrower regions of enrichment are observed.  
626 For *whiI*, this likely corresponds with the binding of just two direct repeats by BldC,  
627 observed *in vitro* (Schumacher MA, den Hengst CD, Bush MJ, Le TBK, Tran NT, Chandra  
628 G, Zeng W, Travis B, Brennan RG, Buttner MJ. Nat Commun. 2018 9:1139. doi:  
629 10.1038/s41467-018-03576-3). Other BldC ChIP-seq targets e.g. *vnz23255* and *cvnA4-D4*  
630 display similarly narrow regions of enrichment and examination of the nucleotide sequence in  
631 these regions likewise reveals a pair of similar and appropriately spaced direct repeats. The  
632 ChIP-seq panels are identical to those shown in Fig. 5. The AT-rich sequences of the verified  
633 (in the case of *whiI* and *smeA*) and candidate direct repeats to which BldC binds are  
634 highlighted below in yellow in the 5'-3' direction.

635

636 **Table S1A.** ChIP-seq data set for *S.venezuelae* BldC.

637 Only those peaks with significance  $p < E-04$  for at least one of the timepoints are included in  
638 the analysis. “Pos” = position in the *S. venezuelae* genome in bases. “Indiff” = the difference  
639 between the local normalized (ln) values of the immunoprecipitated wild type samples and  
640  $\Delta bldC$  mutant for each of the time points (Indiff 10hr and Indiff 14hr). “min apv” = minimum

641 adjusted p-value for the 10 hr and 14 hr timepoints. “Closestgene” = nearest annotated gene  
642 relative to the position of significance. “lgene” = the identity of a gene where present on the  
643 left of the significant position and in the 5’-3’ direction. “lproduct” = the predicted gene  
644 product of the lgene. “ldist” = the distance between the significant position and the predicted  
645 start codon of the lgene. “igene” = the identity of a gene where the significant position is  
646 found within (“in”) a coding region. “iproduct” = the predicted gene product of igene. “idist”  
647 = the distance between the significant position and the predicted start codon of the igene.  
648 “rgene” = the identity of a gene where present on the right of the significant position and in  
649 the 5’-3’ direction. “rproduct” = the predicted gene product of the rgene. “rdist” = the  
650 distance between the significant position and the predicted start codon of the rgene. Where  
651 present, for each of lgene, igene and rgene, the relative expression values generated by RNA-  
652 seq are listed for each time point (lgene/igene/rgene logFC 10hr and lgene/igene/rgene logFC  
653 14hr). Where the logFC >1, cell values are highlighted in red, where the logFC<-1, cell  
654 values are highlighted in yellow.

655

656 **Table S1B.** Complete RNA-seq data for BldC. Shown is the relative gene expression for the  
657 *ΔbldC* mutant compared to the wild type at the 10 hr and 14 hr timepoints. For each gene, the  
658 log fold change (logFC) and average p-value (apv) is listed at each timepoint. The canonical  
659 gene name (if known) and expected gene product are also listed. Where the logFC >1, cell  
660 values are highlighted in red, where the logFC<-1, cell values are highlighted in yellow.

661

662 **Table S1C.** BldC represses the transcription of genes during vegetative growth. Listed are  
663 BldC ChIP-seq targets that are significantly upregulated (logFC >1) in the absence of *bldC*  
664 during vegetative growth at either the 10 hr or 14 hr timepoints, as determined by RNAseq.  
665 Ordered by logFC at 10hr and then by logFC at 14hr. For each ChIP-seq target, the position,

666 minimum adjusted p-value (min apv), the gene, expected product and distance to the  
667 predicted start codon (dist) is also listed. Where the logFC >1, cell values are highlighted in  
668 red, where the logFC <-1, cell values are highlighted in yellow.

669

670 **Table S1D.** Selected RNA-seq data for the *dcw* cluster (A), the conservons (B) and genes  
671 involved in aerial mycelium formation (C) For each gene, the gene product and log fold  
672 change (logFC 10 hr and logFC 14 hr) is listed. Where the logFC >1, cell values are  
673 highlighted in red, where the logFC <-1, cell values are highlighted in yellow.

674

675 **Table S1E.** BldC activates the transcription of genes during vegetative growth. Listed are  
676 BldC ChIP-seq targets that are significantly downregulated (logFC <-1) in the absence of  
677 *bldC* during vegetative growth, as determined by RNAseq. Ordered by logFC at 10hr and  
678 then by logFC at 14hr. For each ChIP-seq target, the position, minimum adjusted p-value  
679 (min apv), the gene, expected product and distance to the predicted start codon (dist) is also  
680 listed.

681

682 **Table S2.** Analysis of BldC ChIP-seq “peaks”. For each maximum significant position (Max  
683 Sig Pos) or ChIP-seq “peak” (as listed in Table S1A), the genomic positions of the left-most  
684 (Pos L) and right-most (Pos R) significant positions are recorded as well as the distance  
685 between these positions (Width) at both the 10 hr and 14 hr timepoints. “FASTA” =  
686 nucleotide sequences between pos L and pos R. “Nearest Gene” = closest gene to the  
687 maximum significant position. “Class” = the class of BldC enrichment observed upon manual  
688 inspection of the ChIP-seq peak. BldC binding generates either a narrow or broad region of  
689 enrichment. BldC targets with broad regions of enrichment generally correlate to “peak”

690 widths >300bp and examination of the nucleotide sequences reveals multiple AT-rich  
691 sequences that would support BldC-multimerisation similar to that observed in the *smeA*-  
692 BldC structure (Schumacher MA, den Hengst CD, Bush MJ, Le TBK, Tran NT, Chandra G,  
693 Zeng W, Travis B, Brennan RG, Buttner MJ. Nat Commun. 2018 9:1139. doi:  
694 10.1038/s41467-018-03576-3). BldC targets with narrow regions of enrichment generally  
695 correlate to “peak” widths <300bp and examination of the nucleotide sequences reveals fewer  
696 AT-rich sequences that would support BldC-multimerisation similar to that observed in the  
697 *whiI*-BldC structure (Schumacher MA, den Hengst CD, Bush MJ, Le TBK, Tran NT,  
698 Chandra G, Zeng W, Travis B, Brennan RG, Buttner MJ. Nat Commun. 2018 9:1139. doi:  
699 10.1038/s41467-018-03576-3). Peaks recorded as “Broad\*” are broad and >300bp upon  
700 manual inspection but their significance based upon the threshold applied in our analysis  
701 means that a much narrower region is considered bioinformatically.

702

703 **Table S3.** Strains, Plasmids and Oligonucleotide primers used in this study

704

705 **Movie S1.** Time-lapse microscopy of the wild-type strain carrying the FtsZ-YPet fusion. DIC  
706 (A) and YFP-channel (B) movies are at 5 frames per second. The time following the first  
707 image is indicated at the bottom left. Images were taken every 30 minutes (DIC 150 ms; YFP  
708 100 ms). Movies were assembled in the Fiji software package (<http://fiji.sc/Fiji>).

709

710 **Movie S2.** Time-lapse microscopy of the *bldC* mutant carrying the FtsZ-YPet fusion. DIC  
711 (A) and YFP-channel (B) movies are at 5 frames per second. The time following the first  
712 image is indicated at the bottom left. Images were taken every 30 minutes (DIC 150 ms; YFP  
713 100 ms). Movies were assembled in the Fiji software package (<http://fiji.sc/Fiji>).

714



715 **Movie S3.** Time-lapse microscopy of the complemented strain carrying the FtsZ-YPet fusion.  
716 DIC (A) and YFP-channel (B) movies are at 5 frames per second. The time following the first  
717 image is indicated at the bottom left. Images were taken every 30 minutes (DIC 150 ms; YFP  
718 100 ms). Movies were assembled in the Fiji software package (<http://fiji.sc/Fiji>).  
719
